# Supplementary material for: Supramolecular Binding with Lectins: A New Route for Non-Covalent Functionalization of Polysaccharide Matrices
Source: MDPI journal article supplement (doi:10.3390/molecules27175633), 2022-09-01
Supplement: s1 [file s1]

## Supporting Information

### Lectins, a new route for non-covalent polysaccharide functionalization

*Devis Montroni,\* Matteo Di Giosia, Matteo Calvaresi, and Giuseppe Falini*

|                                                                                     |      |
|-------------------------------------------------------------------------------------|------|
| Figure S1: UV-Vis spectrum of WGA-FITC                                              | p. 2 |
| Figure S2: SDS-PAGE of WGA and WGA-FITC.                                            | P. 2 |
| Figure S3: Confocal image of a control and WGA-FITC treated chitin sample sections. | p. 3 |
| Figure S4: Typical stress-strain plots from the uniaxial tensile tests.             | p. 3 |
| Figure S5: Desorption kinetic of WGA-FITC in PBS.                                   | p. 4 |
| Table S1: FTIR absorption bands reported in $\text{cm}^{-1}$ .                      | p. 5 |

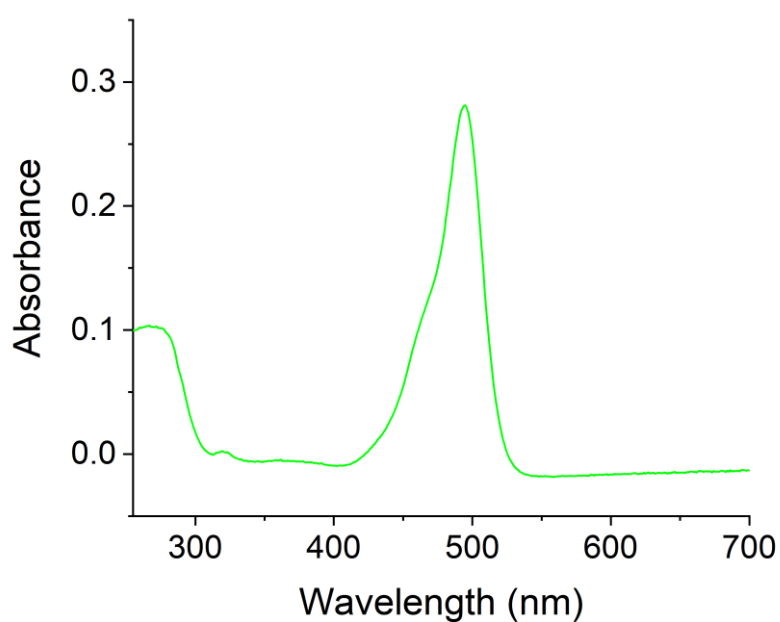

Figure S1: UV-Vis spectrum of WGA-FITC collected after dialysis purification. The absorption band, showing the maximum at 495 nm, is diagnostic for FITC and is used for FITC quantification.

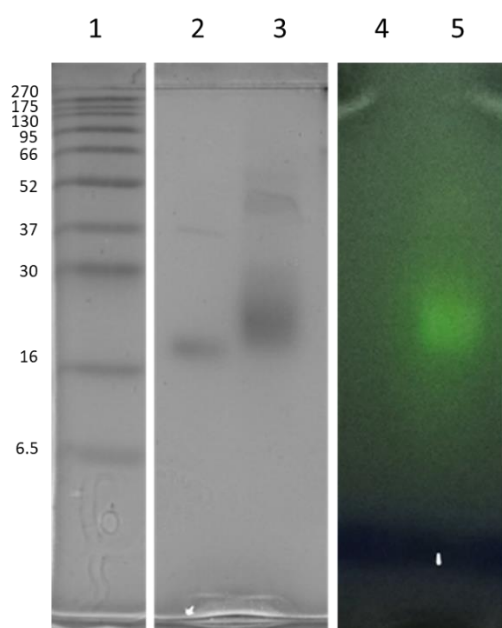

Figure S2. SDS-PAGE analysis of WGA and WGA-FITC. Each well was loaded with 10  $\mu$ l of: 1) Elite Pre-stained Protein Ladder, 2) WGA, 3) WGA-FITC, acquired under white light illumination. 4) WGA, 5) WGA-FITC acquired under UV illumination (365 nm). Fluorescent imaging (lanes 4,5) was carried out before staining with Coomassie Blue G-250 (lanes 1,2,3).

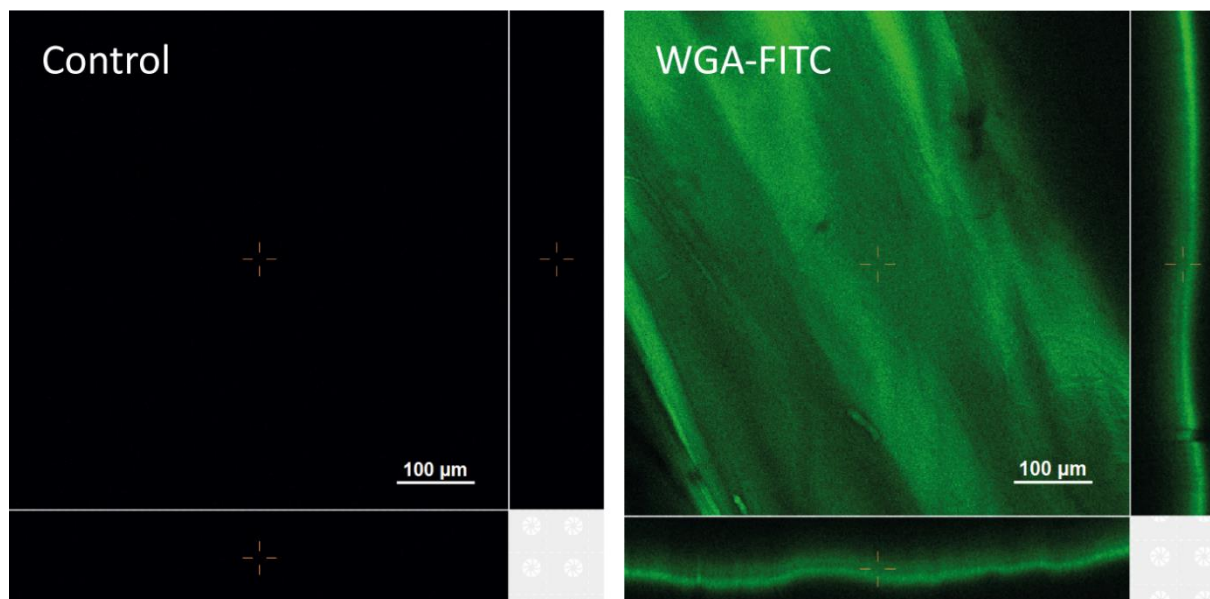

Figure S3: Confocal image of a control (left) and WGA-FITC treated (right) chitin samples.

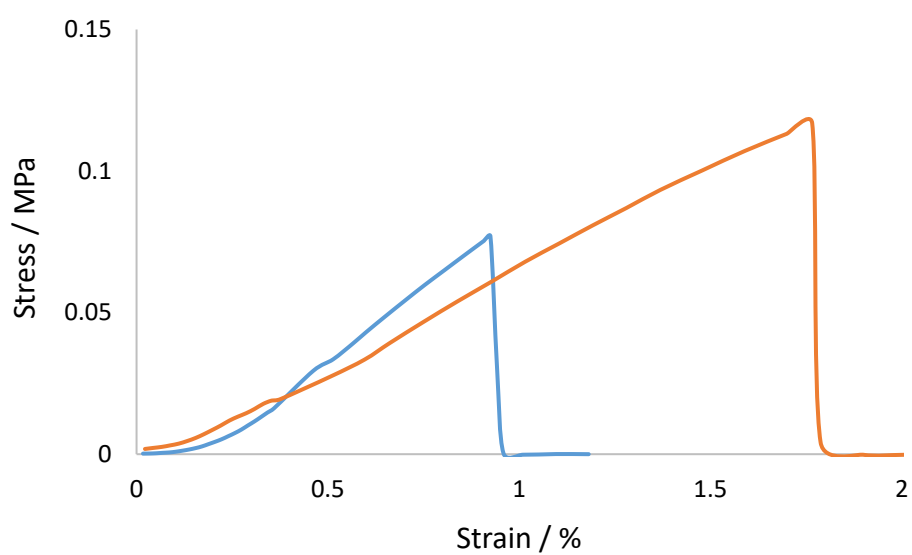

Figure S4: Typical stress-strain plots from the uniaxial tensile tests. One specimen for each group is shown, the WGA-treated matrix (orange) and the control matrix (blue).

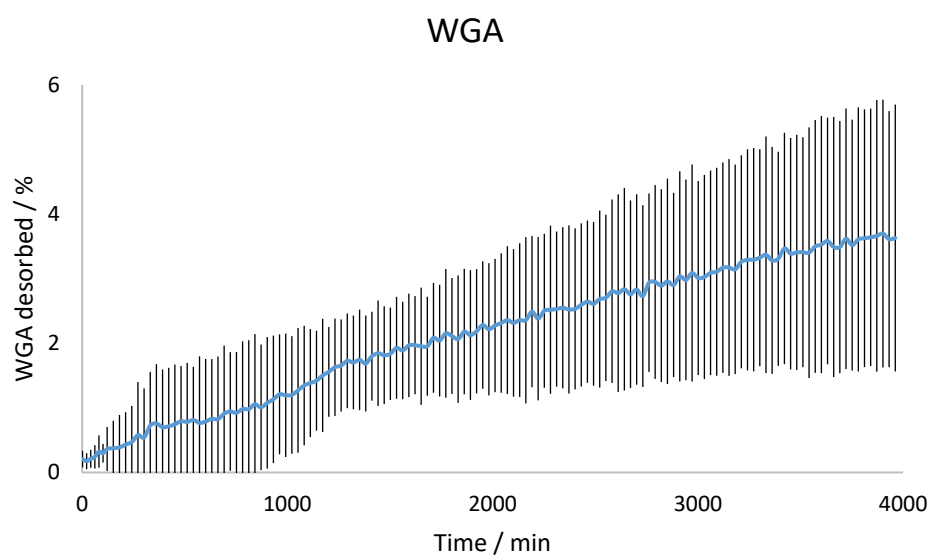

Figure S5: Desorption kinetic of WGA-FITC in PBS from the chitin sample expressed in percentage of WGA-FITC desorbed from the matrix respect to the one present in it.

Table S1: FTIR absorption bands reported in cm<sup>-1</sup> (Pearson, Marchessault, & Liang, 1960).

| Control | WGA-FITC |                                                                                |
|---------|----------|--------------------------------------------------------------------------------|
| 3428    | 3424     | OH stretching                                                                  |
| 3285    | 3279     | NH stretching                                                                  |
| 3095    | 3098     | NH stretching                                                                  |
| 2919    | 2823     | CH <sub>3</sub> stretching                                                     |
| 2868    | 2868     | Symmetric CH <sub>3</sub> stretching and asymmetric CH <sub>2</sub> stretching |
| 1655    | 1655     | Amide I band                                                                   |
| 1554    | 1553     | Amide II band                                                                  |
| 1431    | 1426     | CH <sub>2</sub> bending and CH <sub>3</sub> deformation                        |
| 1375    | 1375     | CH bending and symmetric CH <sub>3</sub> deformation                           |
| 1310    | 1308     | CH <sub>2</sub> wagging                                                        |
| 1262    | 1261     | Amide III band                                                                 |
| 1202    | 1202     |                                                                                |
| 1155    | 1155     | Asymmetric bridge oxygen stretching                                            |
| 1112    | 1112     | Asymmetric in-phase ring stretching mode                                       |
| 1068    | 1067     | CO stretching                                                                  |
| 1031    | 1031     | CO stretching                                                                  |
| 950     | 949      | CH <sub>3</sub> wagging                                                        |
| 905     | 900      | Ring stretching                                                                |

Pearson, F. G., Marchessault, R. H., & Liang, C. Y. (1960). Infrared spectra of crystalline polysaccharides. V. Chitin. *Journal of Polymer Science*, 43(141), 101-116.
